# Supplementary material
Source: PubMed Central journal article supplement (PMC3076837)
Supplement: 1016774108_pnas.201016774SI.pdf [file 1016774108_pnas.201016774SI.pdf]

# Supporting Information

Powers et al. 10.1073/pnas.1016774108

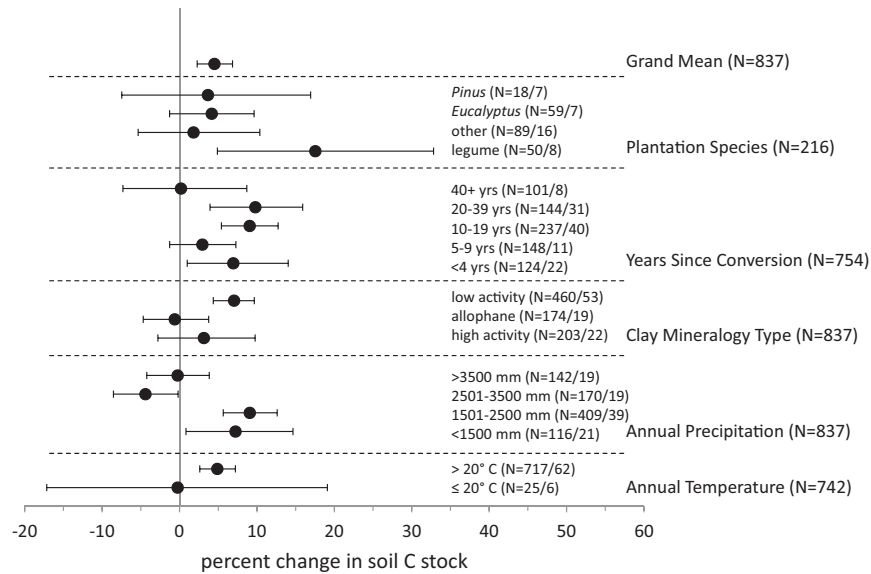

**Fig. S1.** Percentage change in total soil carbon stocks (with approximate 95% confidence intervals obtained by bootstrapping) in the tropics averaged across land-use transitions and sampling depths for observations categorized by plantation species (for all conversions to plantations), years since conversion, clay mineralogy, annual precipitation, or annual temperature. Category names appear beside datapoints and the number of observations for each mean is in parentheses, followed by the number of studies from which the observations were drawn.

## Other Supporting Information Files

[Dataset S1 \(XLSX\)](#)
